# Supplementary material for: Radiosynthesis and preclinical evaluation of [68Ga]Ga-NOTA-folate for PET imaging of folate receptor β-positive macrophages
Source: PubMed Central journal article supplement (PMC7423886; doi:10.1038/s41598-020-70394-3), 2020-08-12
Supplement: 41598_2020_70394_MOESM1_ESM.pdf [file 41598_2020_70394_MOESM1_ESM.pdf]

Supplementary Information for:

**Radiosynthesis and Preclinical Evaluation of [<sup>68</sup>Ga]Ga-NOTA-Folate for PET Imaging of Folate Receptor  $\beta$ -Positive Macrophages**

Olli Moisio<sup>1#</sup>, Senthil Palani<sup>1#</sup>, Jenni Virta<sup>1</sup>, Petri Elo<sup>1</sup>, Heidi Liljenbäck<sup>1,2</sup>, Tuula Tolvanen<sup>3</sup>, Meeri Käkälä<sup>1</sup>, Maxwell G. Miner<sup>1</sup>, Erika Atencio Herre<sup>1</sup>, Päivi Marjamäki<sup>1</sup>, Tiit Örd<sup>4</sup>, Merja Heinäniemi<sup>5</sup>, Minna U. Kaikkonen<sup>4</sup>, Fenghua Zhang<sup>6</sup>, Madduri Srinivasarao<sup>6</sup>, Juhani Knuuti<sup>1,3</sup>, Philip S. Low<sup>6</sup>, Antti Saraste<sup>1,3,7</sup>, Xiang-Guo Li<sup>1,8</sup>, and Anne Roivainen<sup>1,2,3\*</sup>

<sup>1</sup> *Turku PET Centre, University of Turku, Turku, Finland*

<sup>2</sup> *Turku Center for Disease Modeling, University of Turku, Turku, Finland*

<sup>3</sup> *Turku PET Centre, Turku University Hospital, Turku, Finland*

<sup>4</sup> *A.I. Virtanen Institute for Molecular Sciences, University of Eastern Finland, Kuopio, Finland*

<sup>5</sup> *Institute of Biomedicine, University of Eastern Finland, Kuopio, Finland*

<sup>6</sup> *Department of Chemistry, Purdue University, West Lafayette, Indiana, United States of America*

<sup>7</sup> *Heart Center, Turku University Hospital and University of Turku, Turku, Finland*

<sup>8</sup> *Turku PET Centre, Åbo Akademi University, Turku, Finland*

#Equal contribution

\*Correspondence: Anne Roivainen, Turku PET Centre, Kiinamyllynkatu 4-8, FI-20520 Turku, Finland. Tel: +35823132862, E-mail: [anne.roivainen@utu.fi](mailto:anne.roivainen@utu.fi).

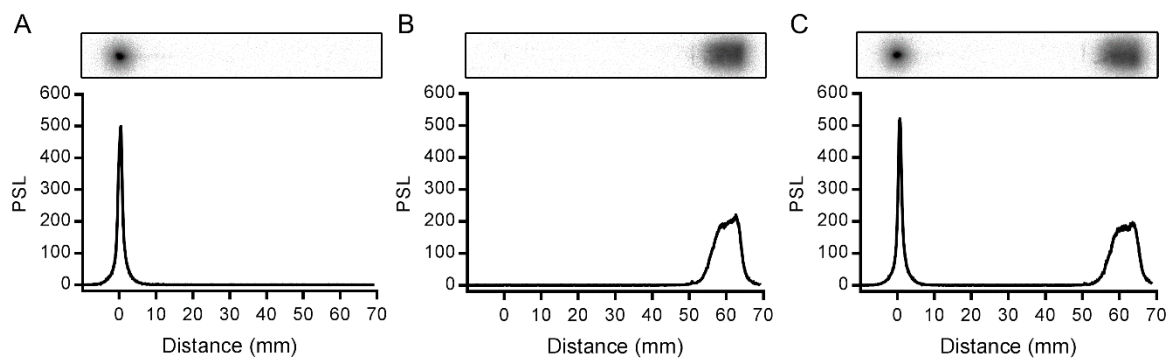

**Figure S1.** Representative autoradiographs (upper panels) and chromatograms (lower panels) of instant thin-layer silica gel (iTLC-SG) strips developed with 50 mM citric acid for (A)  $^{68}\text{Ga}$ -FOL, (B) unbound  $^{68}\text{Ga}$  in the reaction mixture without NOTA-folate precursor, and (C) co-application of  $^{68}\text{Ga}$ -FOL and  $^{68}\text{Ga}$ .

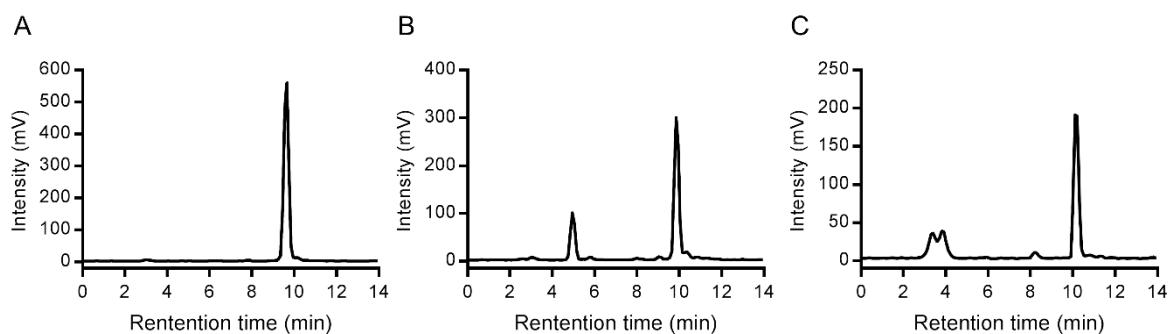

**Figure S2.** Representative radio-HPLC chromatograms of (A)  $^{68}\text{Ga}$ -FOL standard, (B) rat plasma 60 minutes after  $^{68}\text{Ga}$ -FOL injection, and (C) mouse plasma 60 minutes after  $^{68}\text{Ga}$ -FOL injection.

**Table S1.** *Ex vivo* biodistribution of <sup>68</sup>Ga-FOL 60 minutes post-injection in mice, expressed as standardized uptake values (means ± SD)

| Tissue                          | LDLR <sup>-/-</sup> ApoB <sup>100/100</sup><br>atherosclerotic mice<br>(n = 4) | LDLR <sup>-/-</sup> ApoB <sup>100/100</sup><br>atherosclerotic mice, blocking<br>(n = 4) | C67BL/6JRj<br>control mice<br>(n = 6)         |
|---------------------------------|--------------------------------------------------------------------------------|------------------------------------------------------------------------------------------|-----------------------------------------------|
| <b>Aorta</b>                    | 0.75 ± 0.12                                                                    | 0.09 ± 0.03 ( <i>P</i> = 0.001) <sup>a</sup>                                             | 0.41 ± 0.10 ( <i>P</i> = 0.004) <sup>b</sup>  |
| <b>Brown adipose tissue</b>     | 0.29 ± 0.04                                                                    | 0.06 ± 0.02 ( <i>P</i> = 0.006) <sup>a</sup>                                             | 0.31 ± 0.05 ( <i>P</i> = 0.51) <sup>b</sup>   |
| <b>Blood</b>                    | 0.23 ± 0.09                                                                    | 0.29 ± 0.10 ( <i>P</i> = 0.48) <sup>a</sup>                                              | 0.25 ± 0.14 ( <i>P</i> = 0.84) <sup>b</sup>   |
| <b>Bone (skull)</b>             | 0.13 ± 0.05                                                                    | 0.06 ± 0.02 ( <i>P</i> = 0.04) <sup>a</sup>                                              | 0.16 ± 0.04 ( <i>P</i> = 0.42) <sup>b</sup>   |
| <b>Bone + marrow (femur)</b>    | 0.24 ± 0.18                                                                    | 0.07 ± 0.01 ( <i>P</i> = 0.17) <sup>a</sup>                                              | 0.18 ± 0.04 ( <i>P</i> = 0.57) <sup>b</sup>   |
| <b>Brain</b>                    | 0.08 ± 0.01                                                                    | 0.02 ± 0.00 ( <i>P</i> = 0.001) <sup>a</sup>                                             | 0.06 ± 0.01 ( <i>P</i> = 0.02) <sup>b</sup>   |
| <b>Heart</b>                    | 0.20 ± 0.02                                                                    | 0.05 ± 0.02 ( <i>P</i> < 0.0001) <sup>a</sup>                                            | 0.24 ± 0.03 ( <i>P</i> = 0.04) <sup>b</sup>   |
| <b>Intestine, small (empty)</b> | 0.44 ± 0.06                                                                    | 0.42 ± 0.10 ( <i>P</i> = 0.84) <sup>a</sup>                                              | 0.47 ± 0.27 ( <i>P</i> = 0.76) <sup>b</sup>   |
| <b>Intestine, large (empty)</b> | 0.73 ± 0.14                                                                    | 0.19 ± 0.06 ( <i>P</i> = 0.003) <sup>a</sup>                                             | 0.66 ± 0.08 ( <i>P</i> = 0.38) <sup>b</sup>   |
| <b>Kidneys</b>                  | 22.30 ± 3.28                                                                   | 2.65 ± 1.80 ( <i>P</i> = 0.0002) <sup>a</sup>                                            | 20.27 ± 5.48 ( <i>P</i> = 0.49) <sup>b</sup>  |
| <b>Lungs</b>                    | 0.46 ± 0.03                                                                    | 0.19 ± 0.04 ( <i>P</i> < 0.0001) <sup>a</sup>                                            | 0.39 ± 0.06 ( <i>P</i> = 0.05) <sup>b</sup>   |
| <b>Liver</b>                    | 1.04 ± 0.43                                                                    | 0.33 ± 0.13 ( <i>P</i> = 0.04) <sup>a</sup>                                              | 0.76 ± 0.16 ( <i>P</i> = 0.29) <sup>b</sup>   |
| <b>Lymph node</b>               | 1.37 ± 0.57                                                                    | 0.14 ± 0.02 ( <i>P</i> = 0.02) <sup>a</sup>                                              | 4.07 ± 0.73 ( <i>P</i> = 0.0002) <sup>b</sup> |
| <b>Muscle</b>                   | 0.20 ± 0.02                                                                    | 0.05 ± 0.01 ( <i>P</i> < 0.0001) <sup>a</sup>                                            | 0.13 ± 0.02 ( <i>P</i> = 0.0003) <sup>b</sup> |
| <b>Pancreas</b>                 | 0.43 ± 0.06                                                                    | 0.07 ± 0.02 ( <i>P</i> = 0.0007) <sup>a</sup>                                            | 0.37 ± 0.03 ( <i>P</i> = 0.17) <sup>b</sup>   |
| <b>Plasma</b>                   | 0.40 ± 0.15                                                                    | 0.48 ± 0.13 ( <i>P</i> = 0.44) <sup>a</sup>                                              | 0.34 ± 0.15 ( <i>P</i> = 0.61) <sup>b</sup>   |
| <b>Spleen</b>                   | 0.23 ± 0.07                                                                    | 0.15 ± 0.05 ( <i>P</i> = 0.11) <sup>a</sup>                                              | 0.28 ± 0.13 ( <i>P</i> = 0.42) <sup>b</sup>   |
| <b>Stomach (empty)</b>          | 0.78 ± 0.14                                                                    | 0.25 ± 0.05 ( <i>P</i> = 0.002) <sup>a</sup>                                             | 0.65 ± 0.12 ( <i>P</i> = 0.17) <sup>b</sup>   |
| <b>Thymus</b>                   | 0.42 ± 0.13                                                                    | 0.06 ± 0.01 ( <i>P</i> = 0.01) <sup>a</sup>                                              | 0.33 ± 0.08 ( <i>P</i> = 0.25) <sup>b</sup>   |
| <b>White adipose tissue</b>     | 0.22 ± 0.16                                                                    | 0.03 ± 0.01 ( <i>P</i> = 0.10) <sup>a</sup>                                              | 0.30 ± 0.08 ( <i>P</i> = 0.40) <sup>b</sup>   |

The blocking study was performed by injecting a 100-fold molar excess of folate glucosamine 1 minute before <sup>68</sup>Ga-FOL.

<sup>a</sup> Difference between LDLR<sup>-/-</sup>ApoB<sup>100/100</sup> atherosclerotic mice vs. atherosclerotic mice + blocking, as assessed by independent-samples *t*-test.

<sup>b</sup> Difference between LDLR<sup>-/-</sup>ApoB<sup>100/100</sup> atherosclerotic vs. C57BL//6JRj control mice, as assessed by independent-samples *t*-test.

**Table S2.** Human dose equivalent estimates (mSv/MBq) extrapolated from rat PET data

| Organ                | Organ doses |
|----------------------|-------------|
| Adrenals             | 0.0243      |
| Brain                | 0.0043      |
| Esophagus            | 0.0121      |
| Eyes                 | 0.0110      |
| Gallbladder wall     | 0.0139      |
| Left colon           | 0.0140      |
| Small intestine      | 0.0180      |
| Stomach wall         | 0.0131      |
| Right colon          | 0.0184      |
| Rectum               | 0.0134      |
| Heart wall           | 0.0078      |
| Kidneys              | 0.1420      |
| Liver                | 0.0118      |
| Lungs                | 0.0069      |
| Pancreas             | 0.0135      |
| Prostate             | 0.0134      |
| Salivary glands      | 0.0119      |
| Red marrow           | 0.0102      |
| Osteogenic cells     | 0.0096      |
| Spleen               | 0.0173      |
| Testes               | 0.0119      |
| Thymus               | 0.0120      |
| Thyroid              | 0.0113      |
| Urinary bladder wall | 0.0132      |
| Total body           | 0.0130      |
| Effective dose       | 0.0105      |
